# Supplementary material for: The effects of occupational disruption during COVID-19 lockdowns on health: a cross-sectional study
Source: PeerJ. 2024 Jun 26;12:e17594. doi: 10.7717/peerj.17594 (PMC11214427; doi:10.7717/peerj.17594)
Supplement: Data S1 [file peerj-12-17594-s001.xlsx]

## Sheet: Sheet0
StartDate	EndDate	Progress	Duration (in seconds)	Finished	RecordedDate	ResponseId	RecipientLastName	RecipientFirstName	RecipientEmail	ExternalReference	LocationLatitude	LocationLongitude	DistributionChannel	UserLanguage	Q2	Q3	Q4	Q5	Q6	Q7_1	Q7_2	Q8_1	Q8_2	Q9_1	Q9_2	Q10_1	Q10_2	Q11_1	Q11_2	Q12_1	Q12_2	Q13_1	Q13_2	Q14_1	Q14_2	Q14_3	Q14_4	Q14_5	Q14_6	Q14_7	Q14_8	Q14_9	Q14_10	Q14_11	Q14_12	Q14_13	Q14_14	Q14_15	Q14_16
Start Date	End Date	Progress	Duration (in seconds)	Finished	Recorded Date	Response ID	Recipient Last Name	Recipient First Name	Recipient Email	External Data Reference	Location Latitude	Location Longitude	Distribution Channel	User Language	Would you like to participate in the survey?	What is your age?	What is your gender?	What is your race/ethnicity?	What is your current country of residence?	What was your employment status: - Before COVID-19?	What was your employment status: - During COVID-19 Lockdowns?	Describe your overall health: - Before COVID-19?	Describe your overall health: - During COVID-19 Lockdowns?	Describe your ability to live as usual and meet your responsibilities: - Before COVID-19?	Describe your ability to live as usual and meet your responsibilities: - During COVID-19 Lockdowns?	How was your quality of life: - Before COVID-19?	How was your quality of life: - During COVID-19 Lockdowns?	How was your physical health: - Before COVID-19?	How was your physical health: - During COVID-19 Lockdowns?	How was your mental health: - Before COVID-19?	How was your mental health: - During COVID-19 Lockdowns?	How were your social relationships: - Before COVID-19?	How were your social relationships: - During COVID-19 Lockdowns?	For each of the following activities, indicate how well you were able to perform the activity during COVID-19 lockdowns compared to what you did before the pandemic. - Personal hygiene activities (e.g. taking showers or baths, brushing teeth, grooming, and dressing)	For each of the following activities, indicate how well you were able to perform the activity during COVID-19 lockdowns compared to what you did before the pandemic. - Sleep and rest	For each of the following activities, indicate how well you were able to perform the activity during COVID-19 lockdowns compared to what you did before the pandemic. - Healthy eating	For each of the following activities, indicate how well you were able to perform the activity during COVID-19 lockdowns compared to what you did before the pandemic. - Activities to satisfy sexual needs	For each of the following activities, indicate how well you were able to perform the activity during COVID-19 lockdowns compared to what you did before the pandemic. - Activities involving caring for children, other people, or pets	For each of the following activities, indicate how well you were able to perform the activity during COVID-19 lockdowns compared to what you did before the pandemic. - Activities to maintain house, yard, garden, house plants, appliances, vehicles, and repairs	For each of the following activities, indicate how well you were able to perform the activity during COVID-19 lockdowns compared to what you did before the pandemic. - Religious or spiritual activities (e.g. prayer, meditation, reading the Bible, Koran, or other religious books)	For each of the following activities, indicate how well you were able to perform the activity during COVID-19 lockdowns compared to what you did before the pandemic. - Shopping (in-store or online)	For each of the following activities, indicate how well you were able to perform the activity during COVID-19 lockdowns compared to what you did before the pandemic. - Physical activities like exercise, jogging, hiking, running, or walking outside	For each of the following activities, indicate how well you were able to perform the activity during COVID-19 lockdowns compared to what you did before the pandemic. - Participating in classes, programs, or activities for education or skills development	For each of the following activities, indicate how well you were able to perform the activity during COVID-19 lockdowns compared to what you did before the pandemic. - Regular work for pay	For each of the following activities, indicate how well you were able to perform the activity during COVID-19 lockdowns compared to what you did before the pandemic. - Volunteering to serve others (that is, working without pay)	For each of the following activities, indicate how well you were able to perform the activity during COVID-19 lockdowns compared to what you did before the pandemic. - Play or recreational activities	For each of the following activities, indicate how well you were able to perform the activity during COVID-19 lockdowns compared to what you did before the pandemic. - Engaging in activities that result in interacting with others in social networks, religious or spiritual groups	For each of the following activities, indicate how well you were able to perform the activity during COVID-19 lockdowns compared to what you did before the pandemic. - Engaging in group activities with family, friends or peers who support each other	For each of the following activities, indicate how well you were able to perform the activity during COVID-19 lockdowns compared to what you did before the pandemic. - Engaging in activities to give and receive affection, not necessarily including intimacy or sexual activity
2021-09-22 18:01:41	2021-09-22 18:02:05	9	24	False	2021-09-29 18:02:06	R_3IaTUEm3GAI5n2O							anonymous	EN	Yes
2021-09-22 19:27:33	2021-09-22 19:27:59	9	25	False	2021-09-29 19:28:38	R_tSrJgrfKD1TCJk5							qr	EN	Yes
2021-09-26 11:29:56	2021-09-26 11:31:03	9	67	False	2021-10-03 11:31:06	R_1n2YAF9OiPkiicP							anonymous	EN	Yes
2021-09-27 15:51:23	2021-09-27 16:00:58	9	574	False	2021-10-04 16:00:59	R_1dMsEZkSmtWOrZp							anonymous	EN	Yes
2021-10-06 21:43:36	2021-10-06 21:50:38	100	422	True	2021-10-06 21:50:38	R_3IX0BUWwEMv6dnw					33.8874	-111.951	anonymous	EN	Yes	39	Female	White	Usa	Employed	Employed	Good	Good	Very Good	Average	Good	Average	Average	Average	Good	Average	Good	Average	Same as before	Worse than before	Worse than before	Worse than before	Better than before	Same as before	Same as before	Same as before	Same as before	Worse than before	Same as before	Worse than before	Worse than before	Much worse than before	Worse than before	Worse than before
2021-10-06 21:56:53	2021-10-06 22:01:48	100	294	True	2021-10-06 22:01:48	R_1MYaGqqrFbePOIj					33.6276	-112.051	anonymous	EN	Yes	58	Female	White	USA	Employed	Employed	Poor	Poor	Good	Average	Good	Average	Poor	Poor	Good	Good	Good	Poor	Worse than before	Better than before	Same as before	Same as before	Better than before	Better than before	Same as before	Better than before	Worse than before	Same as before	Same as before	Same as before	Worse than before	Much worse than before	Worse than before	Worse than before
2021-10-06 22:04:21	2021-10-06 22:15:52	100	691	True	2021-10-06 22:15:53	R_1eK0L7kJoj9mGuu					-1.2841	36.8155	anonymous	EN	Yes	48	Male	African/Meru	Kenya	Employed	Employed	Good	Good	Good	Good	Good	Average	Good	Good	Good	Good	Very Good	Average	Same as before	Same as before	Same as before	Same as before	Worse than before	Same as before	Worse than before	Same as before	Same as before	Worse than before	Same as before	Same as before	Worse than before	Same as before	Worse than before	Worse than before
2021-10-06 22:29:50	2021-10-06 22:35:26	100	336	True	2021-10-06 22:35:27	R_2YagvVYygTcICqx					33.6613	-112.04	anonymous	EN	Yes	30	Female	White	USA	Employed	Employed	Very Good	Very Good	Very Good	Good	Very Good	Average	Very Good	Good	Very Good	Good	Very Good	Good	Same as before	Same as before	Worse than before	Same as before	Worse than before	Same as before	Worse than before	Worse than before	Same as before	Worse than before	Worse than before	Worse than before	Much worse than before	Much worse than before	Worse than before	Much worse than before
2021-10-06 22:43:13	2021-10-06 22:53:13	100	600	True	2021-10-06 22:53:14	R_wSp9pVu7Nto6lQl					35.2303	-111.579	anonymous	EN	Yes	68	Female	Caucasian	USA	Unemployed	Unemployed	Good	Good	Good	Good	Very Good	Good	Good	Good	Good	Average	Good	Poor	Same as before	Same as before	Same as before	Same as before	Same as before	Same as before	Same as before	Much worse than before	Same as before	Much worse than before	Same as before	Much worse than before	Same as before	Much worse than before	Much worse than before	Much worse than before
2021-10-07 00:24:11	2021-10-07 00:32:20	100	488	True	2021-10-07 00:32:20	R_3EyzwzvKTYkmdLn					-1.2841	36.8155	anonymous	EN	Yes	43	Male	African	Kenya	Employed	Employed	Very Good	Very Good	Very Good	Average	Very Good	Average	Very Good	Good	Very Good	Average	Very Good	Average	Same as before	Better than before	Better than before	Much better than before	Better than before	Same as before	Much worse than before	Much worse than before	Much better than before	Much worse than before	Much worse than before	Same as before	Much better than before	Much worse than before	Much worse than before	Much worse than before
2021-10-07 02:59:43	2021-10-07 03:07:04	100	441	True	2021-10-07 03:07:04	R_XoVJ1kFhvgKsB2x					40.3404	-76.7882	anonymous	EN	Yes	31	Female	Caucasian	United States of America	Employed	Employed	Very Good	Good	Very Good	Good	Very Good	Good	Very Good	Good	Very Good	Good	Very Good	Very Good	Same as before	Worse than before	Same as before	Same as before	Same as before	Same as before	Same as before	Same as before	Same as before	Worse than before	Same as before	Worse than before	Same as before	Same as before	Same as before	Same as before
2021-10-07 09:08:59	2021-10-07 09:14:37	100	337	True	2021-10-07 09:14:37	R_2anLeRLebHxB0lU					-1.2841	36.8155	anonymous	EN	Yes	44	Female	Meru	Kenya	Employed	Employed	Good	Average	Good	Average	Good	Average	Good	Average	Good	Average	Good	Good	Same as before	Same as before	Same as before	Worse than before	Same as before	Same as before	Worse than before	Much better than before	Same as before	Worse than before	Same as before	Same as before	Same as before	Worse than before	Worse than before	Worse than before
2021-10-07 10:12:21	2021-10-07 10:21:45	100	564	True	2021-10-07 10:21:45	R_2tyelpwgkESNhsS					-1.2841	36.8155	anonymous	EN	Yes	48	Female	African	Kenya	Employed	Employed	Good	Average	Good	Good	Good	Average	Good	Good	Good	Good	Good	Good	Worse than before	Much worse than before	Much worse than before	Much better than before	Same as before	Much better than before	Much better than before	Much better than before	Worse than before	Much better than before	Same as before	Same as before	Worse than before	Better than before	Much better than before	Better than before
2021-10-07 20:12:12	2021-10-07 20:19:56	100	464	True	2021-10-07 20:19:57	R_3Op5lGZWqm4TkA4					39.5449	-119.757	anonymous	EN	Yes	40	Female	Prefer not to answer	United States of America	Employed	Employed	Good	Very Good	Good	Very Good	Good	Very Good	Good	Very Good	Average	Good	Average	Poor	Better than before	Better than before	Better than before	Better than before	Much better than before	Much better than before	Same as before	Worse than before	Much better than before	Worse than before	Same as before	Worse than before	Worse than before	Worse than before	Worse than before	Worse than before
2021-10-07 20:36:33	2021-10-07 20:41:39	100	306	True	2021-10-07 20:41:40	R_1hW46sUvzbepDvt					33.3322	-111.994	anonymous	EN	Yes	32	Female	White/ Hispanic	United States	Employed	Employed	Good	Average	Good	Good	Good	Average	Good	Average	Average	Average	Good	Average	Same as before	Same as before	Worse than before	Same as before	Same as before	Same as before	Worse than before	Same as before	Worse than before	Same as before	Same as before	Worse than before	Worse than before	Worse than before	Worse than before	Same as before
2021-10-07 20:56:35	2021-10-07 21:03:26	100	410	True	2021-10-07 21:03:26	R_2cc2VaOyrRftz3n					33.2409	-111.779	anonymous	EN	Yes	45	Female	White/Caucasian	United States	Employed	Employed	Good	Good	Very Good	Good	Very Good	Good	Very Good	Good	Very Good	Average	Very Good	Average	Same as before	Same as before	Same as before	Same as before	Same as before	Better than before	Same as before	Same as before	Same as before	Same as before	Same as before	Same as before	Same as before	Worse than before	Same as before	Same as before
2021-10-08 05:24:22	2021-10-08 05:35:11	100	649	True	2021-10-08 05:35:11	R_3JIZ87YTTJ2ZLWM					34.6906	-118.142	anonymous	EN	Yes	28	Female	African American	Los Angeles	Student	Employed	Very Good	Very Good	Very Poor	Very Good	Very Poor	Good	Very Good	Very Good	Poor	Average	Very Good	Very Poor	Same as before	Same as before	Worse than before	Worse than before	Better than before	Same as before	Much worse than before	Same as before	Worse than before	Worse than before	Better than before	Much worse than before	Much worse than before	Much worse than before	Much worse than before	Much worse than before
2021-10-08 10:20:55	2021-10-08 10:28:30	100	454	True	2021-10-08 10:28:30	R_20ZQlQBQsdWQLfi					-1.2841	36.8155	anonymous	EN	Yes	46	Male	African	Kenya	Employed	Employed	Very Good	Very Good	Good	Average	Good	Average	Very Good	Good	Very Good	Average	Very Good	Poor	Same as before	Worse than before	Worse than before	Worse than before	Worse than before	Worse than before	Worse than before	Worse than before	Worse than before	Worse than before	Worse than before	Worse than before	Worse than before	Worse than before	Worse than before	Worse than before
2021-10-09 09:34:35	2021-10-09 09:41:02	100	386	True	2021-10-09 09:41:02	R_1fZ1onlt3coHk1E					34.1361	-118.167	anonymous	EN	Yes	36	Female	White	USA	Employed	Employed	Very Good	Good	Very Good	Average	Very Good	Average	Very Good	Average	Very Good	Average	Very Good	Average	Worse than before	Worse than before	Same as before	Worse than before	Same as before	Same as before	Better than before	Same as before	Worse than before	Much worse than before	Worse than before	Much worse than before	Much worse than before	Much worse than before	Worse than before	Worse than before
2021-10-09 09:53:51	2021-10-09 10:06:08	100	736	True	2021-10-09 10:06:08	R_O7fMEhCK2Q5QUEN					37.5172	-121.919	anonymous	EN	Yes	47	Male	African	USA	Employed	Employed	Good	Average	Very Good	Good	Good	Average	Good	Average	Very Good	Good	Good	Good	Same as before	Same as before	Worse than before	Same as before	Worse than before	Same as before	Worse than before	Worse than before	Worse than before	Much worse than before	Worse than before	Same as before	Much worse than before	Much worse than before	Worse than before	Same as before
2021-10-09 15:13:25	2021-10-09 15:23:59	100	634	True	2021-10-09 15:24:00	R_3e8FjhveE2xItfF					-1.2841	36.8155	anonymous	EN	Yes	47	Male	Black	USA	Employed	Employed	Very Good	Very Good	Good	Good	Very Good	Good	Very Good	Good	Very Good	Average	Very Good	Average	Same as before	Same as before	Better than before	Better than before	Same as before	Better than before	Worse than before	Worse than before	Worse than before	Worse than before	Worse than before	Worse than before	Worse than before	Worse than before	Worse than before	Worse than before
2021-10-09 22:02:38	2021-10-09 22:12:36	100	597	True	2021-10-09 22:12:36	R_3sekYWbxfMRUQEx					32.4557	-117	anonymous	EN	Yes	29	Female	Hispanic	US	Employed	Employed	Average	Very Good	Average	Average	Good	Average	Average	Very Good	Good	Good	Very Good	Average	Same as before	Better than before	Better than before	Same as before	Same as before	Same as before	Same as before	Worse than before	Much better than before	Worse than before	Same as before	Same as before	Worse than before	Worse than before	Worse than before	Worse than before
2021-10-11 17:45:05	2021-10-11 17:52:03	100	417	True	2021-10-11 17:52:03	R_2U4LeR8kVEFgyxa					39.1027	-94.5925	anonymous	EN	Yes	34	Female	White, non Hispanic	USA	Employed	Employed	Good	Good	Average	Good	Average	Good	Average	Good	Good	Good	Very Good	Average	Same as before	Better than before	Much better than before	Same as before	Same as before	Much better than before	Same as before	Better than before	Same as before	Same as before	Same as before	Worse than before	Worse than before	Same as before	Worse than before	Same as before
2021-10-07 07:27:37	2021-10-07 07:28:25	9	47	False	2021-10-14 07:28:27	R_AHilmEcbk2Xo0pP							anonymous	EN	Yes
2021-10-07 16:16:51	2021-10-07 16:17:40	9	48	False	2021-10-14 16:17:42	R_8f9tyZD2iWemHdL							anonymous	EN	Yes
2021-10-16 18:06:11	2021-10-16 18:07:19	59	67	False	2021-10-23 18:07:19	R_1OknzTrG1fEtUAD							anonymous	EN	Yes	30	Female	White	United States	Employed	Employed	Very Good	Very Good	Very Good	Very Good	Very Good	Good	Very Good	Very Good	Very Good	Good	Very Good	Very Good
2021-10-25 04:02:35	2021-10-25 04:09:03	100	387	True	2021-10-25 04:09:04	R_2dKnZlPO8O0PZNN					-17.815	31.0478	anonymous	EN	Yes	36	Female	African	Zimbabwe	Employed	Employed	Good	Average	Good	Average	Average	Poor	Good	Average	Good	Poor	Average	Poor	Same as before	Worse than before	Worse than before	Same as before	Worse than before	Worse than before	Much worse than before	Worse than before	Same as before	Much worse than before	Worse than before	Worse than before	Worse than before	Worse than before	Worse than before	Worse than before
2021-10-25 04:30:57	2021-10-25 04:34:24	100	207	True	2021-10-25 04:34:25	R_2YtUj8mQuJjVQdT					39.6327	-75.6998	anonymous	EN	Yes	44	Female	White	Usa	Employed	Employed	Good	Good	Good	Good	Good	Average	Good	Good	Good	Average	Good	Good	Same as before	Same as before	Worse than before	Same as before	Same as before	Same as before	Same as before	Worse than before	Same as before	Worse than before	Same as before	Worse than before	Worse than before	Worse than before	Worse than before	Same as before
2021-10-27 10:32:23	2021-10-27 11:09:23	100	2220	True	2021-10-27 11:09:24	R_22t9Rwjf2Cyfksq					34.1049	-117.813	qr	EN	Yes	43	Female	Korean-American	United States	Employed	Employed	Poor	Good	Poor	Good	Poor	Good	Poor	Average	Very Poor	Good	Average	Good	Worse than before	Much better than before	Same as before	Worse than before	Much better than before	Same as before	Better than before	Worse than before	Better than before	Same as before	Better than before	Same as before	Better than before	Same as before	Same as before	Worse than before
2021-10-27 11:31:27	2021-10-27 11:43:11	100	703	True	2021-10-27 11:43:11	R_sRmhNPWGuA4HGwx					31.5822	74.3292	anonymous	EN	Yes	38	Female	Pakistani	Pakistan	Employed	Employed	Good	Good	Good	Average	Good	Average	Good	Good	Good	Average	Good	Poor	Same as before	Worse than before	Better than before	Better than before	Better than before	Better than before	Better than before	Much worse than before	Worse than before	Worse than before	Worse than before	Worse than before	Worse than before	Worse than before	Worse than before	Same as before
2021-11-01 11:12:18	2021-11-01 11:16:45	100	266	True	2021-11-01 11:16:46	R_22G43BYolldF2pL					33.338	-111.743	anonymous	EN	Yes	28	Female	white	usa	Employed	Employed	Good	Poor	Good	Poor	Good	Very Poor	Good	Poor	Good	Very Poor	Good	Poor	Same as before	Worse than before	Worse than before	Worse than before	Same as before	Same as before	Same as before	Worse than before	Worse than before	Much worse than before	Same as before	Same as before	Worse than before	Much worse than before	Much worse than before	Much worse than before
2021-11-01 11:12:01	2021-11-01 11:16:55	100	293	True	2021-11-01 11:16:55	R_1dFAPCw0haWPMti					33.338	-111.743	anonymous	EN	Yes	58	Female	white	us	Employed	Employed	Good	Average	Very Good	Average	Very Good	Average	Good	Average	Good	Average	Good	Average	Same as before	Worse than before	Much worse than before	Worse than before	Same as before	Better than before	Worse than before	Worse than before	Much worse than before	Same as before	Same as before	Much worse than before	Worse than before	Worse than before	Worse than before	Worse than before
2021-11-01 11:11:46	2021-11-01 11:17:23	100	337	True	2021-11-01 11:17:23	R_1LqBLXtMjdMUW24					33.338	-111.743	anonymous	EN	Yes	24	Female	White	United States	Employed	Employed	Average	Average	Average	Poor	Good	Average	Good	Average	Average	Average	Good	Poor	Same as before	Same as before	Worse than before	Worse than before	Same as before	Same as before	Same as before	Same as before	Worse than before	Worse than before	Worse than before	Worse than before	Worse than before	Worse than before	Worse than before	Worse than before
2021-11-01 11:15:32	2021-11-01 11:18:07	100	154	True	2021-11-01 11:18:07	R_1cYYLFrhczM91Q1					33.338	-111.743	anonymous	EN	Yes	25	Male	White	Usa	Employed	Employed	Very Good	Good	Very Good	Good	Very Good	Very Good	Very Good	Good	Very Good	Good	Very Good	Good	Same as before	Same as before	Worse than before	Same as before	Same as before	Same as before	Worse than before	Same as before	Same as before	Same as before	Same as before	Same as before	Worse than before	Same as before	Same as before	Same as before
2021-11-01 11:16:52	2021-11-01 11:21:49	100	297	True	2021-11-01 11:21:50	R_4IyHxsXlyWbOcTf					33.5988	-111.88	anonymous	EN	Yes	24	Female	Hispanic	U.S.	Employed	Student	Average	Average	Average	Average	Average	Poor	Average	Poor	Average	Poor	Average	Poor	Same as before	Worse than before	Worse than before	Worse than before	Same as before	Worse than before	Same as before	Worse than before	Worse than before	Worse than before	Worse than before	Worse than before	Worse than before	Worse than before	Worse than before	Worse than before
2021-11-01 11:22:00	2021-11-01 11:22:08	100	7	True	2021-11-01 11:22:08	R_2rNpqrD3gZhPcRv					33.338	-111.743	anonymous	EN	No
2021-11-01 11:18:55	2021-11-01 11:23:06	100	251	True	2021-11-01 11:23:07	R_3s7G5rTjQvI3gil					33.338	-111.743	anonymous	EN	Yes	26	Female	white	united states	Employed	Employed	Poor	Very Good	Poor	Very Good	Average	Good	Poor	Very Good	Poor	Good	Poor	Very Poor	Better than before	Much better than before	Much better than before	Same as before	Better than before	Much better than before	Much better than before	Same as before	Much better than before	Better than before	Same as before	Same as before	Much better than before	Same as before	Worse than before	Worse than before
2021-11-01 11:12:43	2021-11-01 11:23:35	100	652	True	2021-11-01 11:23:36	R_1EaITw6JQjxYMiy					33.338	-111.743	anonymous	EN	Yes	25	Female	Caucasian, Spanish	United States	Unemployed	Unemployed	Good	Average	Good	Poor	Good	Poor	Good	Good	Good	Average	Average	Average	Same as before	Better than before	Better than before	Worse than before	Same as before	Worse than before	Worse than before	Same as before	Better than before	Same as before	Worse than before	Worse than before	Worse than before	Worse than before	Much worse than before	Much worse than before
2021-11-01 11:12:09	2021-11-01 11:24:07	100	717	True	2021-11-01 11:24:07	R_3HocchBJI4EzYsY					33.5065	-112.066	anonymous	EN	Yes	22	Female	White	United States	Employed	Unemployed	Average	Poor	Good	Average	Good	Average	Good	Good	Average	Poor	Good	Good	Same as before	Same as before	Worse than before	Same as before	Same as before	Same as before	Same as before	Same as before	Same as before	Same as before	Worse than before	Worse than before	Better than before	Same as before	Same as before	Same as before
2021-11-01 11:22:07	2021-11-01 11:26:51	100	283	True	2021-11-01 11:26:51	R_2CCamHDY2Lbo25H					33.338	-111.743	anonymous	EN	Yes	25	Female	White	United States	Employed	Employed	Good	Good	Very Good	Very Good	Very Good	Good	Good	Good	Good	Average	Good	Poor	Same as before	Worse than before	Worse than before	Same as before	Same as before	Same as before	Worse than before	Worse than before	Better than before	Same as before	Same as before	Worse than before	Same as before	Worse than before	Same as before	Worse than before
2021-11-01 11:22:28	2021-11-01 11:27:05	100	276	True	2021-11-01 11:27:05	R_vquh419SUxwKtPP					33.338	-111.743	anonymous	EN	Yes	24	Female	White	United States	Employed	Unemployed	Good	Average	Very Good	Poor	Good	Average	Good	Good	Good	Poor	Good	Poor	Same as before	Worse than before	Same as before	Same as before	Worse than before	Worse than before	Same as before	Same as before	Worse than before	Worse than before	Much worse than before	Much worse than before	Worse than before	Worse than before	Worse than before	Worse than before
2021-11-01 11:23:46	2021-11-01 11:27:16	100	209	True	2021-11-01 11:27:18	R_3fqMycB12fDq6bc					33.2727	-111.828	anonymous	EN	Yes	25	Female	white	usa	Student	Student	Very Good	Very Good	Very Good	Good	Very Good	Average	Very Good	Good	Very Good	Average	Very Good	Average	Worse than before	Better than before	Worse than before	Same as before	Same as before	Same as before	Same as before	Same as before	Worse than before	Worse than before	Same as before	Worse than before	Worse than before	Worse than before	Worse than before	Worse than before
2021-11-01 11:24:36	2021-11-01 11:28:43	100	246	True	2021-11-01 11:28:43	R_2zvy1D07v1y9tZG					33.338	-111.743	anonymous	EN	Yes	23	Female	white	USA	Employed	Student	Very Good	Very Good	Very Good	Very Good	Very Good	Average	Very Good	Very Good	Average	Poor	Average	Average	Same as before	Same as before	Same as before	Same as before	Same as before	Same as before	Same as before	Same as before	Same as before	Worse than before	Same as before	Much worse than before	Same as before	Same as before	Worse than before	Same as before
2021-11-01 11:32:40	2021-11-01 11:35:48	100	188	True	2021-11-01 11:35:49	R_2YzUh0WOsdQoZRl					33.338	-111.743	anonymous	EN	Yes	25	Female	White	USA	Employed	Student	Average	Average	Good	Average	Good	Good	Average	Average	Good	Average	Average	Average	Same as before	Same as before	Same as before	Same as before	Same as before	Same as before	Same as before	Same as before	Same as before	Same as before	Same as before	Same as before	Same as before	Same as before	Same as before	Same as before
2021-11-01 11:35:08	2021-11-01 11:43:42	100	513	True	2021-11-01 11:43:42	R_322xJ7qDBKLSulY					33.6276	-112.051	anonymous	EN	Yes	24	Female	white	United States	Employed	Employed	Good	Average	Very Good	Average	Good	Average	Good	Poor	Good	Poor	Average	Average	Better than before	Worse than before	Much worse than before	Same as before	Better than before	Same as before	Much worse than before	Worse than before	Worse than before	Much worse than before	Better than before	Worse than before	Worse than before	Much worse than before	Much worse than before	Worse than before
2021-11-01 12:10:57	2021-11-01 12:16:02	100	304	True	2021-11-01 12:16:02	R_xDFWYCz2NTCeckp					33.3289	-111.866	anonymous	EN	Yes	29	Male	Black	USA	Student	Student	Very Good	Very Good	Very Good	Average	Very Good	Average	Very Good	Very Good	Very Good	Good	Very Good	Average	Same as before	Same as before	Same as before	Same as before	Same as before	Same as before	Same as before	Worse than before	Worse than before	Worse than before	Worse than before	Worse than before	Worse than before	Worse than before	Worse than before	Same as before
2021-11-01 12:21:40	2021-11-01 12:25:54	100	253	True	2021-11-01 12:25:54	R_2DUnULTBumKcBGL					33.338	-111.743	anonymous	EN	Yes	23	Male	American	USA	Student	Student	Good	Poor	Good	Poor	Good	Poor	Average	Poor	Average	Very Poor	Good	Average	Worse than before	Worse than before	Worse than before	Same as before	Same as before	Worse than before	Worse than before	Worse than before	Same as before	Much worse than before	Same as before	Much worse than before	Much worse than before	Much worse than before	Much worse than before	Much worse than before
2021-11-01 12:27:38	2021-11-01 12:30:20	100	161	True	2021-11-01 12:30:21	R_27gl7cHtpUnZoBh					33.338	-111.743	anonymous	EN	Yes	31	Female	white	USA	Employed	Unemployed	Very Good	Very Good	Very Good	Very Poor	Very Good	Very Poor	Very Good	Poor	Very Good	Very Poor	Very Good	Poor	Same as before	Worse than before	Much worse than before	Much worse than before	Worse than before	Much better than before	Same as before	Much worse than before	Much worse than before	Same as before	Much worse than before	Much worse than before	Much worse than before	Much worse than before	Much worse than before	Much worse than before
2021-11-01 12:33:31	2021-11-01 12:37:17	100	225	True	2021-11-01 12:37:17	R_2fGSY4H3Xfan8dW					33.3121	-111.821	anonymous	EN	Yes	31	Female	White	USA	Employed	Unemployed	Very Good	Poor	Very Good	Poor	Very Good	Poor	Very Good	Poor	Very Good	Poor	Very Good	Very Poor	Much worse than before	Much worse than before	Worse than before	Much worse than before	Worse than before	Worse than before	Worse than before	Worse than before	Worse than before	Much worse than before	Much worse than before	Much worse than before	Much worse than before	Much worse than before	Much worse than before	Much worse than before
2021-11-01 11:59:40	2021-11-01 12:53:24	100	3224	True	2021-11-01 12:53:26	R_1cZgCkAX31dJJyC					33.338	-111.743	anonymous	EN	Yes	24	Female	Asian	United States of America	Employed	Employed	Good	Average	Good	Good	Good	Average	Good	Good	Good	Average	Average	Poor	Better than before	Better than before	Same as before	Worse than before	Same as before	Worse than before	Better than before	Worse than before	Worse than before	Worse than before	Worse than before	Same as before	Worse than before	Worse than before	Better than before	Worse than before
2021-11-01 12:48:23	2021-11-01 12:54:22	100	359	True	2021-11-01 12:54:23	R_3nDjb16CchZOB3U					33.2752	-111.708	anonymous	EN	Yes	31	Male	Caucasian	United States	Student	Student	Very Good	Very Good	Very Good	Average	Very Good	Average	Very Good	Very Good	Good	Average	Good	Poor	Same as before	Same as before	Same as before	Same as before	Better than before	Better than before	Same as before	Same as before	Better than before	Worse than before	Same as before	Same as before	Same as before	Worse than before	Much worse than before	Worse than before
2021-11-01 12:56:48	2021-11-01 13:03:08	100	379	True	2021-11-01 13:03:08	R_1NyqHsIhMFkfSsV					33.3981	-111.785	anonymous	EN	Yes	25	Female	White	United States of America	Employed	Student	Average	Poor	Very Good	Poor	Very Good	Poor	Average	Poor	Average	Poor	Good	Poor	Same as before	Worse than before	Worse than before	Same as before	Worse than before	Same as before	Worse than before	Worse than before	Worse than before	Worse than before	Worse than before	Better than before	Worse than before	Worse than before	Worse than before	Same as before
2021-11-01 13:02:04	2021-11-01 13:05:40	100	215	True	2021-11-01 13:05:40	R_1MXNmSBzdzv4eQH					33.338	-111.743	anonymous	EN	Yes	23	Female	white	United states	Student	Student	Average	Poor	Good	Average	Good	Average	Good	Average	Average	Poor	Average	Average	Same as before	Better than before	Worse than before	Same as before	Better than before	Better than before	Same as before	Same as before	Worse than before	Same as before	Same as before	Worse than before	Worse than before	Worse than before	Same as before	Same as before
2021-11-01 12:18:12	2021-11-01 13:11:25	100	3192	True	2021-11-01 13:11:26	R_2X0qi2cRSIxWzHq					35.3044	-119.103	anonymous	EN	Yes	28	Female	Hispanic	USA	Student	Student	Good	Good	Very Good	Average	Very Good	Poor	Good	Good	Very Good	Poor	Very Good	Very Poor	Same as before	Same as before	Same as before	Much worse than before	Same as before	Worse than before	Worse than before	Worse than before	Worse than before	Worse than before	Much worse than before	Worse than before	Worse than before	Much worse than before	Worse than before	Much worse than before
2021-11-01 13:14:08	2021-11-01 13:18:15	100	247	True	2021-11-01 13:18:17	R_Xvrbh3T9KIacV7r					33.5594	-112.09	anonymous	EN	Yes	46	Female	Caucasian	USA	Employed	Employed	Average	Average	Average	Average	Average	Average	Average	Average	Average	Average	Good	Average	Worse than before	Same as before	Same as before	Same as before	Worse than before	Same as before	Worse than before	Better than before	Worse than before	Worse than before	Same as before	Much worse than before	Worse than before	Worse than before	Worse than before	Worse than before
2021-11-01 13:05:35	2021-11-01 13:24:37	100	1142	True	2021-11-01 13:24:38	R_3nwm9qDhabjgaxf					33.338	-111.743	anonymous	EN	Yes	28	Female	White	United States	Employed	Student	Good	Good	Very Good	Poor	Good	Average	Good	Average	Good	Poor	Good	Average	Same as before	Same as before	Better than before	Better than before	Same as before	Better than before	Same as before	Better than before	Much better than before	Worse than before	Worse than before	Much worse than before	Worse than before	Worse than before	Worse than before	Worse than before
2021-11-01 13:38:30	2021-11-01 13:43:15	100	284	True	2021-11-01 13:43:16	R_1jMUosv3DH4wxIx					33.4053	-111.723	anonymous	EN	Yes	25	Female	White	United States	Student	Student	Good	Poor	Good	Average	Good	Average	Good	Average	Average	Average	Good	Poor	Same as before	Worse than before	Worse than before	Same as before	Better than before	Better than before	Same as before	Same as before	Worse than before	Worse than before	Same as before	Same as before	Worse than before	Worse than before	Worse than before	Same as before
2021-11-01 13:45:35	2021-11-01 13:52:03	100	387	True	2021-11-01 13:52:03	R_3qlj4rKvn0bdV8h					33.3054	-111.74	anonymous	EN	Yes	27	Female	Asian	Maricopa	Employed	Employed	Average	Average	Very Good	Good	Good	Good	Average	Good	Good	Average	Good	Good	Same as before	Same as before	Same as before	Same as before	Worse than before	Same as before	Better than before	Same as before	Worse than before	Same as before	Same as before	Same as before	Worse than before	Worse than before	Better than before	Same as before
2021-11-01 14:21:40	2021-11-01 14:26:09	100	268	True	2021-11-01 14:26:09	R_UVDpcW4qdRjadrP					33.4053	-111.723	anonymous	EN	Yes	26	Female	White	United States	Student	Student	Very Good	Average	Very Good	Good	Very Good	Poor	Very Good	Average	Good	Poor	Good	Poor	Worse than before	Better than before	Worse than before	Worse than before	Better than before	Better than before	Same as before	Better than before	Better than before	Worse than before	Same as before	Worse than before	Better than before	Worse than before	Much worse than before	Worse than before
2021-11-01 14:30:12	2021-11-01 14:35:05	100	293	True	2021-11-01 14:35:06	R_rrui41YnjKIBEUF					40.7977	-124.157	anonymous	EN	Yes	34	Female	White/Caucasian	USA	Student	Student	Good	Poor	Good	Average	Good	Average	Good	Poor	Good	Very Poor	Average	Average	Same as before	Worse than before	Much worse than before	Same as before	Better than before	Same as before	Much worse than before	Worse than before	Worse than before	Worse than before	Same as before	Same as before	Worse than before	Much worse than before	Much worse than before	Same as before
2021-11-01 14:09:42	2021-11-01 14:57:56	100	2893	True	2021-11-01 14:57:56	R_Azcqu6tUIqyLStH					33.9073	-118.009	anonymous	EN	Yes	23	Female	Caucasian	USA	Employed	Employed	Very Good	Average	Very Good	Very Poor	Very Good	Poor	Very Good	Poor	Very Good	Poor	Very Good	Average	Same as before	Worse than before	Much worse than before	Worse than before	Same as before	Worse than before	Worse than before	Worse than before	Worse than before	Worse than before	Same as before	Worse than before	Much worse than before	Worse than before	Worse than before	Worse than before
2021-11-01 12:44:54	2021-11-01 15:00:51	100	8157	True	2021-11-01 15:00:51	R_3sgXkeJVirUpB90					32.7015	-114.643	anonymous	EN	Yes	25	Female	white	US	Employed	Student	Good	Good	Very Good	Very Good	Very Good	Very Good	Average	Average	Good	Good	Very Good	Very Good	Same as before	Better than before	Worse than before	Same as before	Same as before	Same as before	Same as before	Same as before	Same as before	Same as before	Same as before	Worse than before	Same as before	Same as before	Same as before	Same as before
2021-11-01 14:50:07	2021-11-01 15:02:54	100	767	True	2021-11-01 15:02:55	R_1mVE0ax6iJ1N1B2					36.0588	-115.31	anonymous	EN	Yes	28	Male	White	United States	Student	Student	Good	Poor	Very Good	Average	Good	Average	Good	Very Good	Average	Poor	Good	Very Good	Worse than before	Much better than before	Much better than before	Same as before	Much better than before	Much better than before	Much worse than before	Same as before	Much better than before	Better than before	Much worse than before	Much worse than before	Worse than before	Much worse than before	Worse than before	Better than before
2021-11-01 15:09:57	2021-11-01 15:19:13	100	555	True	2021-11-01 15:19:14	R_5BWo85RSGy91aPD					33.3981	-111.785	anonymous	EN	Yes	22	Female	White	North America	Employed	Employed	Very Good	Average	Good	Average	Good	Average	Very Good	Average	Average	Poor	Very Good	Good	Same as before	Worse than before	Worse than before	Much worse than before	Worse than before	Same as before	Same as before	Worse than before	Worse than before	Worse than before	Much worse than before	Worse than before	Worse than before	Much worse than before	Worse than before	Worse than before
2021-11-01 15:23:56	2021-11-01 15:27:55	100	239	True	2021-11-01 15:27:56	R_2YacpqHmE2VrDlG					33.338	-111.743	anonymous	EN	Yes	31	Female	Latino	United States	Employed	Unemployed	Average	Poor	Good	Poor	Good	Poor	Good	Average	Good	Poor	Good	Good	Same as before	Worse than before	Same as before	Same as before	Same as before	Better than before	Better than before	Worse than before	Better than before	Worse than before	Much worse than before	Much worse than before	Much worse than before	Worse than before	Worse than before	Worse than before
2021-11-01 15:54:56	2021-11-01 15:58:28	100	212	True	2021-11-01 15:58:29	R_2QlfnZNpTG7S2zy					33.4319	-111.643	anonymous	EN	Yes	22	Female	White	USA	Student	Student	Good	Good	Good	Good	Good	Average	Good	Good	Average	Poor	Average	Poor	Worse than before	Same as before	Same as before	Same as before	Same as before	Same as before	Worse than before	Same as before	Worse than before	Same as before	Same as before	Same as before	Better than before	Worse than before	Better than before	Worse than before
2021-11-01 16:17:12	2021-11-01 16:22:22	100	310	True	2021-11-01 16:22:23	R_pi3jF3BjatjfrRn					33.338	-111.743	anonymous	EN	Yes	23	Female	White	United States	Student	Student	Very Good	Average	Very Good	Average	Good	Average	Very Good	Poor	Good	Average	Average	Average	Same as before	Same as before	Same as before	Worse than before	Same as before	Same as before	Same as before	Worse than before	Much worse than before	Worse than before	Much worse than before	Much worse than before	Much worse than before	Much worse than before	Much worse than before	Worse than before
2021-11-01 16:24:02	2021-11-01 16:33:38	100	575	True	2021-11-01 16:33:38	R_w1AQIRm4IS3z5Jv					36.7851	-119.825	anonymous	EN	Yes	26	Female	Asian	United States	Employed	Student	Average	Poor	Average	Average	Average	Average	Average	Poor	Average	Poor	Average	Average	Same as before	Same as before	Worse than before	Worse than before	Same as before	Same as before	Same as before	Worse than before	Worse than before	Worse than before	Same as before	Worse than before	Much worse than before	Worse than before	Worse than before	Worse than before
2021-11-01 15:43:28	2021-11-01 16:33:53	100	3025	True	2021-11-01 16:33:53	R_1kFTX0UbI6zQhUv					33.9576	-118.267	anonymous	EN	Yes	29	Female	Asian	USA	Employed	Employed	Good	Good	Good	Average	Good	Average	Good	Good	Good	Average	Average	Average	Better than before	Same as before	Same as before	Same as before	Same as before	Same as before	Same as before	Same as before	Worse than before	Worse than before	Same as before	Same as before	Worse than before	Worse than before	Worse than before	Same as before
2021-11-01 16:51:07	2021-11-01 17:01:08	100	600	True	2021-11-01 17:01:08	R_2qt3K2iqvLOQ7TY					33.2409	-111.779	anonymous	EN	Yes	48	Female	White	usa	Employed	Employed	Very Good	Good	Very Good	Very Good	Very Good	Very Good	Very Good	Good	Very Good	Good	Very Good	Average	Same as before	Worse than before	Worse than before	Worse than before	Same as before	Same as before	Same as before	Same as before	Worse than before	Worse than before	Same as before	Worse than before	Same as before	Much worse than before	Much worse than before	Same as before
2021-11-01 16:58:50	2021-11-01 17:07:49	100	539	True	2021-11-01 17:07:50	R_1CDCTIW5yRjNjMC					33.3967	-111.655	anonymous	EN	Yes	25	Female	white	USA	Employed	Employed	Good	Good	Very Good	Poor	Average	Poor	Average	Average	Poor	Poor	Average	Good	Same as before	Same as before	Same as before	Same as before	Same as before	Same as before	Same as before	Worse than before	Same as before	Worse than before	Much worse than before	Same as before	Worse than before	Same as before	Better than before	Worse than before
2021-11-01 23:55:14	2021-11-02 00:00:12	100	298	True	2021-11-02 00:00:13	R_2AY9HJisUBHyT38					33.2516	-111.701	anonymous	EN	Yes	32	Female	White	USA	Student	Student	Very Good	Very Good	Very Good	Very Good	Very Good	Very Good	Very Good	Very Good	Very Good	Very Good	Good	Good	Same as before	Same as before	Same as before	Same as before	Same as before	Same as before	Better than before	Same as before	Same as before	Same as before	Same as before	Same as before	Same as before	Worse than before	Worse than before	Worse than before
2021-11-02 11:45:49	2021-11-02 11:50:06	100	256	True	2021-11-02 11:50:06	R_2Yb75zrv9p3zfVe					33.338	-111.743	anonymous	EN	Yes	46	Female	decline	USA	Employed	Employed	Very Good	Good	Very Good	Good	Very Good	Good	Very Good	Average	Very Good	Average	Very Good	Poor	Same as before	Same as before	Same as before	Same as before	Better than before	Better than before	Same as before	Better than before	Same as before	Same as before	Same as before	Same as before	Same as before	Worse than before	Better than before	Better than before
2021-11-02 13:02:55	2021-11-02 13:07:53	100	297	True	2021-11-02 13:07:53	R_ueTP4RuX7yGbZ4Z					33.338	-111.743	anonymous	EN	Yes	50	Female	White/Non-Hispanic	USA	Employed	Employed	Good	Average	Very Good	Good	Good	Good	Good	Good	Good	Poor	Good	Poor	Same as before	Worse than before	Worse than before	Worse than before	Worse than before	Same as before	Same as before	Same as before	Same as before	Same as before	Same as before	Worse than before	Worse than before	Worse than before	Worse than before	Worse than before
2021-11-02 18:50:22	2021-11-02 18:55:37	100	315	True	2021-11-02 18:55:37	R_3OkL1eFtxKN4Tua					33.4342	-111.845	anonymous	EN	Yes	23	Female	caucasian	US	Employed	Employed	Very Good	Very Good	Very Good	Average	Good	Average	Very Good	Good	Very Good	Average	Very Good	Poor	Much better than before	Much better than before	Worse than before	Same as before	Same as before	Better than before	Same as before	Worse than before	Worse than before	Worse than before	Same as before	Much worse than before	Much worse than before	Much worse than before	Much worse than before	Much worse than before
2021-11-02 20:51:33	2021-11-02 20:56:04	100	271	True	2021-11-02 20:56:05	R_3R8EtKcQ6zkPuWB					33.338	-111.743	anonymous	EN	Yes	25	Male	White	USA	Student	Student	Good	Good	Very Good	Good	Very Good	Average	Very Good	Good	Good	Average	Good	Average	Worse than before	Same as before	Better than before	Better than before	Same as before	Better than before	Worse than before	Worse than before	Better than before	Worse than before	Same as before	Worse than before	Worse than before	Worse than before	Worse than before	Same as before
2021-11-03 12:14:40	2021-11-03 12:17:56	100	196	True	2021-11-03 12:17:57	R_DIWrQ8Rsu99cdfb					33.338	-111.743	anonymous	EN	Yes	27	Female	Lebanese American	USA	Student	Student	Good	Good	Good	Average	Very Good	Good	Good	Average	Average	Poor	Good	Average	Same as before	Same as before	Same as before	Same as before	Same as before	Worse than before	Much worse than before	Same as before	Worse than before	Worse than before	Same as before	Worse than before	Worse than before	Worse than before	Much worse than before	Same as before
2021-11-03 19:04:20	2021-11-03 19:11:25	100	424	True	2021-11-03 19:11:25	R_2SvHcgwxiJLtu14					33.4053	-111.723	anonymous	EN	Yes	27	Female	White	USA	Student	Student	Good	Average	Good	Average	Good	Average	Good	Average	Good	Poor	Good	Poor	Worse than before	Worse than before	Worse than before	Same as before	Same as before	Same as before	Same as before	Same as before	Better than before	Same as before	Same as before	Worse than before	Worse than before	Worse than before	Worse than before	Worse than before
2021-11-03 22:47:02	2021-11-03 22:52:10	100	308	True	2021-11-03 22:52:11	R_1jU74NkyvCslIB1					33.5629	-112.052	anonymous	EN	Yes	22	Female	Caucasian	United States	Student	Student	Very Good	Good	Very Good	Average	Very Good	Average	Very Good	Very Good	Very Good	Poor	Very Good	Average	Same as before	Worse than before	Same as before	Same as before	Same as before	Same as before	Same as before	Worse than before	Better than before	Much worse than before	Much worse than before	Much worse than before	Much worse than before	Worse than before	Worse than before	Worse than before
2021-11-04 00:13:26	2021-11-04 00:16:49	100	202	True	2021-11-04 00:16:49	R_sk7s0hGoxWPtVWV					33.4053	-111.723	anonymous	EN	Yes	31	Female	White	USA	Employed	Unemployed	Average	Very Good	Average	Very Good	Average	Very Good	Average	Very Good	Poor	Very Good	Average	Very Good	Much better than before	Much better than before	Much better than before	Much better than before	Much better than before	Much better than before	Same as before	Same as before	Much better than before	Much better than before	Worse than before	Worse than before	Much better than before	Same as before	Same as before	Same as before
2021-11-04 12:31:51	2021-11-04 12:39:18	100	447	True	2021-11-04 12:39:19	R_3fpKCl1BqajCtB9					33.338	-111.743	anonymous	EN	Yes	23	Female	white	USA	Student	Student	Good	Good	Good	Average	Very Good	Good	Good	Good	Good	Good	Very Good	Average	Better than before	Same as before	Same as before	Same as before	Same as before	Same as before	Same as before	Same as before	Better than before	Worse than before	Same as before	Same as before	Same as before	Worse than before	Worse than before	Worse than before
2021-11-05 19:51:31	2021-11-05 19:55:31	100	240	True	2021-11-05 19:55:31	R_5dVNlpinP8wCYyR					33.3813	-111.641	anonymous	EN	Yes	27	Female	Caucasian	United States	Student	Student	Good	Average	Good	Average	Good	Poor	Good	Poor	Good	Very Poor	Good	Poor	Same as before	Worse than before	Worse than before	Better than before	Better than before	Better than before	Worse than before	Worse than before	Worse than before	Worse than before	Same as before	Worse than before	Worse than before	Worse than before	Same as before	Worse than before
2021-11-08 09:31:36	2021-11-08 09:36:44	100	308	True	2021-11-08 09:36:45	R_27DNPQUbEbX9q9G					33.338	-111.743	anonymous	EN	Yes	49	Female	white/hispanic	United States	Employed	Employed	Average	Very Good	Good	Very Good	Average	Good	Average	Very Good	Average	Very Good	Average	Very Good	Much better than before	Much better than before	Much better than before	Same as before	Much better than before	Much better than before	Same as before	Much better than before	Much better than before	Same as before	Same as before	Same as before	Same as before	Better than before	Better than before	Better than before
2021-11-08 09:34:45	2021-11-08 09:39:08	100	263	True	2021-11-08 09:39:08	R_3L5eN0JhDbH7QFW					33.338	-111.743	anonymous	EN	Yes	26	Female	BLACK	USA	Employed	Student	Very Good	Average	Very Good	Average	Very Good	Average	Very Good	Poor	Very Good	Average	Very Good	Poor	Better than before	Same as before	Worse than before	Same as before	Same as before	Same as before	Same as before	Worse than before	Worse than before	Worse than before	Worse than before	Worse than before	Worse than before	Worse than before	Worse than before	Worse than before
2021-11-08 09:31:39	2021-11-08 09:40:25	100	526	True	2021-11-08 09:40:25	R_2cngsx4gneX5RSh					33.3289	-111.866	anonymous	EN	Yes	29	Female	Filipino	United States	Student	Student	Very Good	Very Good	Good	Good	Good	Good	Good	Good	Good	Good	Very Good	Average	Same as before	Same as before	Better than before	Better than before	Same as before	Same as before	Same as before	Same as before	Better than before	Worse than before	Same as before	Worse than before	Same as before	Worse than before	Worse than before	Worse than before
2021-11-08 09:44:19	2021-11-08 09:48:53	100	273	True	2021-11-08 09:48:53	R_b447Hb3ei3Ne9vb					39.4895	-104.845	anonymous	EN	Yes	24	Female	White	USA	Employed	Student	Very Good	Good	Good	Very Good	Good	Good	Good	Average	Good	Very Good	Good	Good	Same as before	Same as before	Same as before	Better than before	Same as before	Same as before	Same as before	Same as before	Better than before	Better than before	Better than before	Better than before	Better than before	Better than before	Better than before	Same as before
2021-11-08 09:31:21	2021-11-08 09:53:30	100	1328	True	2021-11-08 09:53:30	R_s5n65jz8Fd3eoE1					33.4393	-111.77	anonymous	EN	Yes	26	Female	Caucasian	United States	Employed	Employed	Average	Average	Good	Poor	Good	Poor	Good	Poor	Average	Very Poor	Average	Poor	Same as before	Worse than before	Worse than before	Same as before	Same as before	Same as before	Better than before	Worse than before	Worse than before	Same as before	Same as before	Same as before	Worse than before	Much worse than before	Worse than before	Same as before
2021-11-08 09:48:44	2021-11-08 09:54:53	100	368	True	2021-11-08 09:54:54	R_3ho0T4hsfQDg5Be					39.4895	-104.845	anonymous	EN	Yes	24	Female	White/ Caucasian	USA	Student	Student	Very Good	Good	Very Good	Very Good	Very Good	Average	Very Good	Good	Very Good	Poor	Good	Very Poor	Same as before	Better than before	Worse than before	Much worse than before	Better than before	Better than before	Same as before	Same as before	Better than before	Much worse than before	Worse than before	Worse than before	Worse than before	Worse than before	Same as before	Worse than before
2021-11-01 11:12:55	2021-11-01 11:15:38	64	163	False	2021-11-08 10:15:39	R_V4kqCmehjMdlaZr							anonymous	EN	Yes	26	Female	White	United States	Employed	Student	Good	Average	Good	Poor	Good	Very Poor	Good	Poor	Average	Very Poor	Good	Average	Much worse than before	Much worse than before	Much worse than before	Much worse than before	Much worse than before	Same as before	Same as before	Much worse than before	Much worse than before	Much worse than before	Much worse than before	Much worse than before	Much worse than before	Much worse than before	Much worse than before	Much worse than before
2021-11-01 11:21:43	2021-11-01 11:22:24	32	40	False	2021-11-08 10:22:26	R_1Hhq3F5l3SKy9dt							anonymous	EN	Yes	25	Female	caucasian	United States	Student	Student
2021-11-01 11:22:20	2021-11-01 11:23:05	32	44	False	2021-11-08 10:23:05	R_wZ4ycjMIfhbyMil							anonymous	EN	Yes	27	Female	middle eastern	united states	Student	Student
2021-11-01 11:23:47	2021-11-01 11:25:13	32	85	False	2021-11-08 10:25:13	R_OiML4mlYiuZsQkp							anonymous	EN	Yes	24	Male	Latino/Hispanic	USA	Student	Student
2021-11-01 11:20:36	2021-11-01 11:25:29	64	293	False	2021-11-08 10:25:30	R_Tcr66Fh0W3HPOH7							anonymous	EN	Yes	23	Female	White	United States	Student	Student	Very Good	Very Good	Very Good	Poor	Very Good	Good	Very Good	Very Good	Average	Average	Very Good	Very Good	Same as before	Same as before	Same as before	Same as before	Same as before	Same as before	Same as before	Same as before	Same as before	Same as before	Same as before	Same as before	Same as before	Same as before	Same as before	Worse than before
2021-11-08 10:36:05	2021-11-08 10:39:00	100	174	True	2021-11-08 10:39:00	R_3PYNIddPyuEk5Sg					40.2584	-111.659	anonymous	EN	Yes	26	Female	caucasian	United States	Student	Student	Good	Good	Very Good	Average	Very Good	Average	Very Good	Good	Very Good	Poor	Very Good	Average	Same as before	Same as before	Same as before	Better than before	Same as before	Same as before	Worse than before	Worse than before	Worse than before	Worse than before	Same as before	Worse than before	Worse than before	Worse than before	Worse than before	Same as before
2021-11-08 10:38:54	2021-11-08 10:44:12	100	318	True	2021-11-08 10:44:13	R_eXxjYUlGGt8jmud					33.338	-111.743	anonymous	EN	Yes	27	Female	White	US	Employed	Student	Good	Average	Good	Poor	Good	Poor	Good	Average	Average	Very Poor	Good	Poor	Worse than before	Worse than before	Better than before	Same as before	Same as before	Same as before	Same as before	Worse than before	Worse than before	Same as before	Worse than before	Worse than before	Worse than before	Same as before	Worse than before	Worse than before
2021-11-01 11:44:57	2021-11-01 11:45:03	9	5	False	2021-11-08 10:45:03	R_didGVjG3Zv8xZxD							anonymous	EN	Yes
2021-11-01 11:42:33	2021-11-01 11:45:26	82	173	False	2021-11-08 10:45:26	R_2YWZr1DoQtHjL33							anonymous	EN	Yes	25	Female	White	USA	Employed	Employed	Good	Average	Good	Average	Good	Poor	Good	Average	Good	Poor	Good	Poor	Same as before	Same as before	Much better than before	Same as before	Same as before	Same as before	Same as before	Same as before	Same as before	Same as before	Same as before	Same as before	Same as before	Same as before	Same as before	Same as before
2021-11-08 10:39:43	2021-11-08 10:47:14	100	450	True	2021-11-08 10:47:14	R_3oKFUGEZ2n3IfNB					45.4407	-122.779	anonymous	EN	Yes	64	Male	White	Usa	Employed	Unemployed	Average	Average	Good	Good	Good	Average	Average	Average	Good	Good	Good	Average	Same as before	Same as before	Better than before	Same as before	Same as before	Better than before	Same as before	Worse than before	Same as before	Worse than before	Same as before	Same as before	Worse than before	Same as before	Worse than before	Worse than before
2021-11-01 11:47:12	2021-11-01 11:48:27	59	74	False	2021-11-08 10:48:27	R_1f9H3ZQz8zsNDY1							anonymous	EN	Yes	25	Female	Indian Asian	USA	Employed	Unemployed	Good	Average	Very Good	Very Good	Average	Average	Good	Average	Good	Average	Average	Average
2021-11-08 10:44:12	2021-11-08 10:49:46	100	333	True	2021-11-08 10:49:47	R_1g0ywvA27fwxk4E					45.4549	-122.802	anonymous	EN	Yes	31	Male	Caucasian, non hispanic	USA	Employed	Employed	Average	Average	Good	Average	Good	Average	Poor	Very Poor	Very Good	Good	Good	Poor	Same as before	Same as before	Same as before	Same as before	Same as before	Same as before	Same as before	Better than before	Same as before	Much better than before	Much better than before	Same as before	Worse than before	Worse than before	Same as before	Worse than before
2021-11-01 11:51:53	2021-11-01 11:57:26	32	333	False	2021-11-08 10:57:27	R_6KlHt4nu9h20gNj							anonymous	EN	Yes	34	Female	Caucasian	US	Employed	Student
2021-11-01 11:59:44	2021-11-01 12:01:26	59	101	False	2021-11-08 11:01:27	R_11jgSIb4FtViRcO							anonymous	EN	Yes	24	Male	Hispanic	Maricopa	Employed	Employed	Good	Good	Good	Good	Good	Average	Good	Average	Good	Average	Good	Average
2021-11-08 11:04:52	2021-11-08 11:08:29	100	216	True	2021-11-08 11:08:29	R_Ah6HseYwfKYW5ih					33.338	-111.743	anonymous	EN	Yes	24	Female	White	USA	Student	Employed	Average	Poor	Good	Average	Good	Poor	Average	Average	Average	Poor	Average	Average	Same as before	Worse than before	Better than before	Same as before	Same as before	Better than before	Worse than before	Better than before	Better than before	Same as before	Same as before	Worse than before	Same as before	Worse than before	Same as before	Same as before
2021-11-01 12:08:30	2021-11-01 12:15:03	64	392	False	2021-11-08 11:15:03	R_24reeSgzXUz0XFa							anonymous	EN	Yes	24	Female	Caucasian	United States	Student	Student	Good	Average	Very Good	Good	Very Good	Average	Good	Good	Good	Average	Good	Average	Worse than before	Same as before	Same as before	Worse than before	Same as before	Same as before	Better than before	Same as before	Same as before	Same as before	Worse than before	Same as before	Worse than before	Same as before	Same as before	Worse than before
2021-11-08 11:08:28	2021-11-08 11:16:52	100	503	True	2021-11-08 11:16:52	R_1n0cwQ5bSbu1dFF					33.338	-111.743	anonymous	EN	Yes	22	Female	White	United States	Student	Student	Very Good	Very Good	Very Good	Good	Very Good	Good	Good	Average	Good	Good	Good	Average	Same as before	Better than before	Same as before	Same as before	Same as before	Better than before	Better than before	Same as before	Better than before	Same as before	Same as before	Worse than before	Same as before	Same as before	Worse than before	Same as before
2021-11-08 11:28:52	2021-11-08 11:34:45	100	353	True	2021-11-08 11:34:46	R_eEu3z2TLSKPbaOl					33.3504	-111.782	qr	EN	Yes	25	Female	Asian	United States	Employed	Student	Good	Average	Good	Average	Good	Average	Very Good	Average	Very Good	Poor	Very Good	Average	Same as before	Worse than before	Worse than before	Worse than before	Same as before	Same as before	Worse than before	Same as before	Worse than before	Worse than before	Worse than before	Same as before	Worse than before	Worse than before	Worse than before	Worse than before
2021-11-08 11:39:11	2021-11-08 11:48:31	100	559	True	2021-11-08 11:48:31	R_28Y89LVoAFZD9fy					33.3121	-111.821	anonymous	EN	Yes	26	Female	Hispanic	U.S.	Student	Student	Average	Poor	Good	Poor	Good	Poor	Average	Average	Good	Poor	Good	Poor	Worse than before	Same as before	Same as before	Same as before	Same as before	Much better than before	Same as before	Same as before	Worse than before	Much worse than before	Same as before	Worse than before	Worse than before	Worse than before	Worse than before	Same as before
2021-11-08 11:53:32	2021-11-08 11:58:39	100	307	True	2021-11-08 11:58:40	R_8CUtgo64rSL19i9					40.7406	-111.823	anonymous	EN	Yes	24	Female	white	USA	Employed	Student	Very Good	Very Good	Good	Poor	Good	Average	Very Good	Average	Average	Very Poor	Good	Poor	Same as before	Same as before	Worse than before	Same as before	Same as before	Same as before	Worse than before	Same as before	Much worse than before	Same as before	Same as before	Same as before	Worse than before	Worse than before	Worse than before	Worse than before
2021-11-08 10:46:33	2021-11-08 12:05:39	100	4746	True	2021-11-08 12:05:39	R_2PnGMxksAQXYyCa					45.5496	-122.504	anonymous	EN	Yes	62	Female	White	US	Employed	Employed	Very Good	Very Good	Very Good	Average	Very Good	Average	Very Good	Good	Very Good	Average	Very Good	Average	Same as before	Worse than before	Same as before	Same as before	Worse than before	Same as before	Same as before	Worse than before	Same as before	Worse than before	Same as before	Worse than before	Worse than before	Worse than before	Worse than before	Worse than before
2021-11-08 12:03:12	2021-11-08 12:12:56	100	584	True	2021-11-08 12:12:56	R_3fBMD0NcKChTF9I					33.4342	-111.845	anonymous	EN	Yes	51	Female	black	USA	Employed	Employed	Good	Good	Average	Good	Average	Good	Good	Average	Average	Very Good	Average	Poor	Better than before	Much better than before	Much better than before	Much better than before	Much better than before	Much better than before	Better than before	Same as before	Worse than before	Worse than before	Same as before	Much worse than before	Worse than before	Worse than before	Better than before	Better than before
2021-11-08 12:07:57	2021-11-08 12:14:41	100	404	True	2021-11-08 12:14:41	R_2CPaSgHCANpn9k7					33.338	-111.743	anonymous	EN	Yes	23	Female	Caucasian	United States	Employed	Employed	Good	Good	Good	Average	Good	Average	Good	Average	Average	Average	Average	Poor	Same as before	Same as before	Same as before	Same as before	Same as before	Better than before	Same as before	Worse than before	Better than before	Worse than before	Worse than before	Worse than before	Worse than before	Worse than before	Better than before	Worse than before
2021-11-08 12:22:07	2021-11-08 12:25:48	100	221	True	2021-11-08 12:25:49	R_2cpSUPg8czxpmeE					33.3054	-111.74	anonymous	EN	Yes	24	Female	white	united states	Employed	Employed	Good	Average	Very Good	Poor	Very Good	Average	Good	Average	Poor	Average	Very Good	Average	Same as before	Worse than before	Better than before	Better than before	Same as before	Same as before	Same as before	Worse than before	Better than before	Better than before	Same as before	Worse than before	Worse than before	Worse than before	Worse than before	Same as before
2021-11-01 13:46:28	2021-11-01 13:49:45	64	197	False	2021-11-08 12:49:45	R_1qVgbpLkcpwmStB							anonymous	EN	Yes	25	Female	white	USA	Employed	Employed	Very Good	Very Good	Very Good	Very Good	Very Good	Very Good	Very Good	Very Good	Very Good	Good	Very Good	Very Good	Same as before	Same as before	Worse than before	Same as before	Same as before	Same as before	Same as before	Same as before	Worse than before	Worse than before	Same as before	Same as before	Much worse than before	Much worse than before	Much worse than before	Worse than before
2021-11-01 13:58:55	2021-11-01 14:00:41	59	105	False	2021-11-08 13:00:43	R_1FgC0ftZEeNPHeF							anonymous	EN	Yes	26	Female	White	United States	Student	Student	Average	Average	Average	Poor	Good	Average	Average	Average	Good	Average	Good	Poor
2021-11-08 13:21:16	2021-11-08 13:25:46	100	269	True	2021-11-08 13:25:46	R_ABcKOVUqQ865Uyt					33.3349	-111.817	anonymous	EN	Yes	49	Female	hispanic	US	Employed	Employed	Very Good	Very Good	Average	Very Good	Average	Very Good	Very Good	Very Good	Good	Very Good	Good	Very Good	Same as before	Much better than before	Much better than before	Much better than before	Much better than before	Much better than before	Same as before	Same as before	Much better than before	Same as before	Same as before	Much better than before	Much better than before	Much better than before	Much better than before	Much better than before
2021-11-01 15:04:23	2021-11-01 15:05:16	32	53	False	2021-11-08 14:05:17	R_6RS8ybek2W0dGwN							anonymous	EN	Yes	70	Female	Hispanic	US	Employed	Employed
2021-11-08 14:06:59	2021-11-08 14:14:53	100	474	True	2021-11-08 14:14:54	R_33rnqa6lTKcLObC					42.71	-74.0177	anonymous	EN	Yes	26	Female	White	USA	Student	Student	Average	Average	Average	Poor	Good	Poor	Average	Average	Poor	Very Poor	Average	Poor	Much worse than before	Worse than before	Much worse than before	Better than before	Worse than before	Much worse than before	Same as before	Worse than before	Much worse than before	Worse than before	Much worse than before	Same as before	Worse than before	Worse than before	Worse than before	Same as before
2021-11-08 15:06:45	2021-11-08 15:19:18	100	752	True	2021-11-08 15:19:18	R_2c6f7Ld3qSKIpuW					33.4935	-111.921	qr	EN	Yes	26	Female	Hispanic	US	Student	Student	Average	Poor	Good	Poor	Average	Poor	Average	Average	Average	Poor	Average	Average	Same as before	Same as before	Same as before	Same as before	Better than before	Same as before	Same as before	Same as before	Better than before	Worse than before	Same as before	Same as before	Worse than before	Worse than before	Same as before	Same as before
2021-11-08 15:52:23	2021-11-08 15:57:56	100	333	True	2021-11-08 15:57:57	R_2w5oJ8mkuxCUMEq					33.338	-111.743	anonymous	EN	Yes	29	Female	Asian	US	Employed	Student	Very Good	Average	Very Good	Poor	Very Good	Average	Very Good	Good	Very Good	Poor	Very Good	Poor	Same as before	Much better than before	Worse than before	Worse than before	Much better than before	Much better than before	Same as before	Worse than before	Better than before	Worse than before	Much worse than before	Much worse than before	Worse than before	Worse than before	Worse than before	Much worse than before
2021-11-08 17:49:23	2021-11-08 17:53:31	100	247	True	2021-11-08 17:53:31	R_3kOf2ukNseIRcNU					43.7046	-116.358	anonymous	EN	Yes	29	Female	white	USA	Student	Student	Good	Poor	Good	Poor	Average	Poor	Good	Poor	Average	Poor	Average	Average	Same as before	Same as before	Much worse than before	Worse than before	Same as before	Worse than before	Worse than before	Worse than before	Worse than before	Worse than before	Same as before	Worse than before	Worse than before	Much worse than before	Much worse than before	Much worse than before
2021-11-08 18:01:09	2021-11-08 18:03:36	100	146	True	2021-11-08 18:03:36	R_3kjg9rtGQiEyg1d					33.338	-111.743	anonymous	EN	Yes	25	Female	China	USA	Employed	Employed	Good	Good	Good	Good	Good	Good	Good	Good	Good	Good	Good	Good	Same as before	Same as before	Same as before	Same as before	Same as before	Same as before	Same as before	Same as before	Same as before	Same as before	Same as before	Same as before	Same as before	Same as before	Same as before	Same as before
2021-11-08 18:01:59	2021-11-08 18:08:45	100	405	True	2021-11-08 18:08:45	R_cLNard2dVY1ZZxn					33.338	-111.743	anonymous	EN	Yes	27	Female	White	USA	Employed	Student	Very Good	Good	Very Good	Good	Very Good	Good	Very Good	Good	Very Good	Poor	Very Good	Poor	Same as before	Same as before	Same as before	Same as before	Same as before	Same as before	Same as before	Worse than before	Worse than before	Worse than before	Worse than before	Same as before	Worse than before	Worse than before	Worse than before	Same as before
2021-11-08 20:53:30	2021-11-08 21:00:55	100	445	True	2021-11-08 21:00:55	R_2whKDrxZ2YS8Ua9					33.5594	-112.09	anonymous	EN	Yes	23	Female	White	United States	Student	Unemployed	Average	Poor	Average	Poor	Very Good	Poor	Average	Poor	Good	Poor	Average	Average	Same as before	Much worse than before	Worse than before	Worse than before	Same as before	Much worse than before	Same as before	Much better than before	Better than before	Much worse than before	Much worse than before	Worse than before	Same as before	Same as before	Worse than before	Worse than before
2021-11-09 09:35:32	2021-11-09 09:46:25	100	652	True	2021-11-09 09:46:26	R_V54I9hqfPHIZEl3					40.8771	-85.5045	anonymous	EN	Yes	65	Female	White caucasian	United States	Employed	Employed	Very Good	Very Good	Very Good	Good	Very Good	Average	Very Good	Very Good	Very Good	Good	Good	Very Poor	Same as before	Same as before	Worse than before	Same as before	Much better than before	Much better than before	Worse than before	Worse than before	Much better than before	Much worse than before	Same as before	Much worse than before	Much worse than before	Much worse than before	Much worse than before	Much worse than before
2021-11-09 09:58:10	2021-11-09 10:06:23	100	492	True	2021-11-09 10:06:23	R_3k0cH4PgfCtR2en					33.3504	-111.782	anonymous	EN	Yes	56	Female	White	UNITED STATES	Unemployed	Unemployed	Very Good	Very Good	Very Good	Very Good	Very Good	Very Good	Very Good	Good	Very Good	Average	Very Good	Average	Much better than before	Worse than before	Same as before	Same as before	Better than before	Better than before	Better than before	Worse than before	Worse than before	Worse than before	Worse than before	Worse than before	Worse than before	Worse than before	Worse than before	Same as before
2021-11-09 10:03:24	2021-11-09 10:11:38	100	494	True	2021-11-09 10:11:38	R_2WVjWPgORyLiqQ0					40.8771	-85.5045	anonymous	EN	Yes	26	Female	White/non-hispanic	United States	Employed	Employed	Very Good	Good	Good	Good	Good	Average	Very Good	Very Good	Good	Poor	Good	Average	Same as before	Same as before	Same as before	Same as before	Same as before	Better than before	Better than before	Same as before	Better than before	Worse than before	Same as before	Worse than before	Same as before	Worse than before	Worse than before	Worse than before
2021-11-09 09:52:29	2021-11-09 10:33:45	100	2475	True	2021-11-09 10:33:46	R_scKSRztaBS8Ufkt					40.8771	-85.5045	anonymous	EN	Yes	24	Male	white	USA	Student	Student	Good	Good	Good	Poor	Good	Average	Good	Good	Good	Average	Average	Poor	Worse than before	Same as before	Same as before	Worse than before	Same as before	Same as before	Same as before	Worse than before	Same as before	Worse than before	Same as before	Worse than before	Worse than before	Worse than before	Same as before	Worse than before
2021-11-09 10:37:01	2021-11-09 10:42:54	100	353	True	2021-11-09 10:42:55	R_1n0IEoEwPglglED					33.338	-111.743	anonymous	EN	Yes	24	Female	Caucasian	United States	Student	Student	Poor	Average	Average	Good	Poor	Average	Very Poor	Average	Very Poor	Very Poor	Very Good	Very Good	Same as before	Better than before	Better than before	Same as before	Same as before	Better than before	Worse than before	Better than before	Much better than before	Same as before	Same as before	Same as before	Better than before	Same as before	Same as before	Same as before
2021-11-09 10:37:36	2021-11-09 10:47:02	100	566	True	2021-11-09 10:47:02	R_3fTbuECaGSXYWkp					33.338	-111.743	anonymous	EN	Yes	26	Female	white	US	Student	Student	Average	Average	Good	Poor	Good	Poor	Average	Average	Average	Poor	Good	Poor	Worse than before	Much worse than before	Better than before	Same as before	Same as before	Better than before	Same as before	Better than before	Worse than before	Same as before	Same as before	Worse than before	Worse than before	Much worse than before	Much worse than before	Worse than before
2021-11-09 17:54:22	2021-11-09 17:58:33	100	251	True	2021-11-09 17:58:35	R_3lPwO1HdkDQpzCS					33.6069	-112.282	anonymous	EN	Yes	27	Male	white	usa	Employed	Employed	Good	Good	Good	Good	Good	Good	Good	Good	Very Good	Very Good	Good	Average	Same as before	Same as before	Same as before	Same as before	Same as before	Same as before	Same as before	Same as before	Same as before	Same as before	Same as before	Same as before	Same as before	Same as before	Same as before	Same as before
2021-11-09 20:42:48	2021-11-09 20:48:32	100	344	True	2021-11-09 20:48:33	R_1otKL3BBYGag5MH					33.3967	-111.655	anonymous	EN	Yes	24	Female	White	USA	Employed	Student	Good	Good	Good	Poor	Good	Average	Good	Good	Poor	Poor	Good	Poor	Same as before	Better than before	Same as before	Same as before	Same as before	Worse than before	Same as before	Much worse than before	Better than before	Much worse than before	Much worse than before	Much worse than before	Worse than before	Worse than before	Worse than before	Same as before
2021-11-03 11:31:55	2021-11-03 11:43:59	32	724	False	2021-11-10 10:44:00	R_p9T4df8aDJh01dn							anonymous	EN	Yes	27	Male	Vietnamese American	US	Employed	Unemployed
2021-11-11 09:07:42	2021-11-11 09:34:23	100	1601	True	2021-11-11 09:34:23	R_3HFaGjx2412UV0Y					40.8771	-85.5045	anonymous	EN	Yes	36	Female	caucasian	United States	Employed	Unemployed	Very Good	Average	Very Good	Average	Good	Average	Very Good	Average	Very Good	Poor	Very Good	Average	Same as before	Better than before	Better than before	Better than before	Much better than before	Much better than before	Same as before	Better than before	Same as before	Better than before	Worse than before	Same as before	Worse than before	Worse than before	Worse than before	Worse than before
2021-11-11 19:57:05	2021-11-11 20:02:35	100	329	True	2021-11-11 20:02:35	R_1hGOgOLwfH3gigV					41.1315	-112.047	anonymous	EN	Yes	26	Female	Multiracial	United States	Student	Student	Average	Poor	Good	Good	Very Good	Average	Average	Poor	Good	Poor	Good	Average	Same as before	Same as before	Better than before	Same as before	Same as before	Same as before	Same as before	Same as before	Same as before	Same as before	Same as before	Same as before	Same as before	Same as before	Same as before	Same as before
2021-11-11 20:20:30	2021-11-11 20:29:07	100	517	True	2021-11-11 20:29:08	R_3RgaLi2UY8ePVU7					33.491	-112.249	anonymous	EN	Yes	36	Female	Black	United States	Student	Student	Very Good	Very Good	Good	Good	Good	Average	Very Good	Average	Very Good	Average	Good	Average	Same as before	Same as before	Worse than before	Same as before	Same as before	Same as before	Better than before	Worse than before	Same as before	Worse than before	Better than before	Same as before	Worse than before	Worse than before	Worse than before	Much worse than before
2021-11-11 22:33:53	2021-11-11 22:40:00	100	367	True	2021-11-11 22:40:01	R_2YLI4qMZ6U84hrq					34.137	-118.238	anonymous	EN	Yes	39	Female	White	Us	Employed	Unemployed	Good	Average	Very Good	Poor	Very Good	Poor	Very Good	Good	Poor	Very Poor	Average	Poor	Same as before	Worse than before	Worse than before	Same as before	Same as before	Better than before	Better than before	Worse than before	Same as before	Same as before	Same as before	Same as before	Worse than before	Worse than before	Better than before	Same as before
2021-11-12 15:44:57	2021-11-12 15:48:19	100	202	True	2021-11-12 15:48:20	R_3NCAWTgCG7g3MZo					39.6313	-106.511	anonymous	EN	Yes	27	Female	white	us	Student	Student	Very Good	Very Good	Very Good	Good	Good	Good	Very Good	Very Good	Very Good	Very Good	Very Good	Very Good	Same as before	Same as before	Same as before	Same as before	Same as before	Same as before	Same as before	Same as before	Same as before	Same as before	Same as before	Worse than before	Worse than before	Worse than before	Worse than before	Worse than before
2021-11-08 09:31:21	2021-11-08 09:31:29	9	8	False	2021-11-15 09:31:32	R_3QQOBAQL8QdB9MS							anonymous	EN	Yes
2021-11-08 09:31:17	2021-11-08 09:35:11	32	234	False	2021-11-15 09:35:12	R_1dhwl6DT2b92BUB							anonymous	EN	Yes	29	Female	American Indian /Alaska Native	U.S.	Employed	Employed
2021-11-08 09:49:15	2021-11-08 09:51:57	82	162	False	2021-11-15 09:52:02	R_2S07gJqcIETo84c							anonymous	EN	Yes	22	Female	White	United States	Employed	Employed	Average	Poor	Very Good	Good	Very Good	Average	Average	Poor	Good	Poor	Good	Good	Same as before	Worse than before	Much worse than before	Worse than before	Same as before	Same as before	Same as before	Same as before	Worse than before	Much worse than before	Same as before	Much worse than before	Worse than before	Much worse than before	Much worse than before	Worse than before
2021-11-08 15:05:04	2021-11-08 15:05:41	32	37	False	2021-11-15 15:05:47	R_2aWD6xeTwNzlfpT							anonymous	EN	Yes	25	Female	NA	NA	Student	Student
2021-11-08 15:33:38	2021-11-08 15:36:03	64	144	False	2021-11-15 15:36:07	R_1ODKiLv0H3tqVG9							anonymous	EN	Yes	28	Female	Hispanic	Usa	Student	Student	Good	Average	Good	Good	Good	Poor	Good	Average	Good	Very Poor	Good	Average	Same as before	Same as before	Better than before	Same as before	Better than before	Better than before	Same as before	Same as before	Worse than before	Worse than before	Same as before	Much worse than before	Worse than before	Same as before	Better than before	Same as before
2021-11-17 09:44:44	2021-11-17 09:53:43	100	539	True	2021-11-17 09:53:43	R_2XbWiI0yXSHyuNE					40.8771	-85.5045	anonymous	EN	Yes	50	Female	caucasian	USA	Employed	Employed	Good	Good	Good	Good	Good	Good	Good	Good	Very Good	Very Good	Very Good	Very Good	Same as before	Same as before	Same as before	Better than before	Worse than before	Same as before	Worse than before	Worse than before	Better than before	Same as before	Same as before	Worse than before	Worse than before	Worse than before	Worse than before	Worse than before
2021-11-17 15:18:23	2021-11-17 15:25:31	100	427	True	2021-11-17 15:25:31	R_3MbPDwGbv1GW56X					33.4803	-112.395	anonymous	EN	Yes	30	Female	white	USA	Employed	Student	Good	Good	Good	Average	Good	Average	Good	Average	Average	Poor	Average	Poor	Same as before	Worse than before	Worse than before	Same as before	Same as before	Same as before	Worse than before	Worse than before	Worse than before	Same as before	Same as before	Worse than before	Much worse than before	Much worse than before	Much worse than before	Same as before
2021-12-23 10:08:20	2021-12-23 10:09:44	59	84	False	2021-12-30 10:09:45	R_3dKVNLQC7w0Cl2x							anonymous	EN	Yes	39	Male	caucasian	austria	Employed	Employed	Very Good	Very Good	Very Good	Very Good	Good	Good	Average	Very Good	Good	Good	Average	Average
[truncated: 6 more columns]
